# Supplementary material for: Genome-wide identification and characterization profile of phosphatidy ethanolamine-binding protein family genes in carrot
Source: Front Genet. 2022 Nov 8;13:1047890. doi: 10.3389/fgene.2022.1047890 (PMC9696379; doi:10.3389/fgene.2022.1047890)
Supplement: Supplementary file 1 [file Table2.XLSX]

## Sheet: Sheet1
Supplementary Table 2. Verification of the carrot PEBP genes by NCBI-CDD.
Query	Hit type	PSSM-ID	From	To	E-Value	Bitscore	Accession	Short name	Incomplete	Superfamily
Q#1 - >rna-XM_017369916.1	non-specific	177765	1	107	2.72434e-73	215.057	PLN00169	PLN00169	N	cl00227
Q#1 - >rna-XM_017369916.1	superfamily	412238	1	107	2.72434e-73	215.057	cl00227	PEBP superfamily	N	-
Q#1 - >rna-XM_017369916.1	specific	176644	1	96	7.39783e-33	111.696	cd00866	PEBP_euk	N	cl00227
Q#1 - >rna-XM_017369916.1	non-specific	176642	1	96	3.01407e-14	64.3396	cd00457	PEBP	N	cl00227
Q#1 - >rna-XM_017369916.1	specific	395925	1	93	1.12367e-09	51.9865	pfam01161	PBP	N	cl00227
Q#1 - >rna-XM_017369916.1	non-specific	176643	1	57	0.000209897	37.9654	cd00865	PEBP_bact_arch	NC	cl00227
Q#1 - >rna-XM_017369916.1	non-specific	224793	1	31	0.00101544	36.5878	COG1881	PEBP	NC	cl00227
Q#1 - >rna-XM_017369916.1	non-specific	129572	3	57	0.0097902	33.6112	TIGR00481	TIGR00481	NC	cl00227
Q#2 - >rna-XM_017369907.1	non-specific	177765	1	174	2.11486e-118	332.158	PLN00169	PLN00169	-	cl00227
Q#2 - >rna-XM_017369907.1	superfamily	412238	1	174	2.11486e-118	332.158	cl00227	PEBP superfamily	-	-
Q#2 - >rna-XM_017369907.1	specific	176644	27	163	6.49531e-43	140.201	cd00866	PEBP_euk	-	cl00227
Q#2 - >rna-XM_017369907.1	non-specific	176642	56	163	8.35638e-18	75.8956	cd00457	PEBP	N	cl00227
Q#2 - >rna-XM_017369907.1	specific	395925	64	126	2.05532e-11	58.5349	pfam01161	PBP	C	cl00227
Q#2 - >rna-XM_017369907.1	non-specific	176643	64	134	1.57371e-05	42.5878	cd00865	PEBP_bact_arch	NC	cl00227
Q#2 - >rna-XM_017369907.1	non-specific	224793	64	151	3.32113e-05	41.9806	COG1881	PEBP	N	cl00227
Q#2 - >rna-XM_017369907.1	non-specific	129572	64	134	0.00186395	36.6928	TIGR00481	TIGR00481	NC	cl00227
Q#3 - >rna-XM_017362136.1	non-specific	177765	1	153	4.51359e-107	302.498	PLN00169	PLN00169	-	cl00227
Q#3 - >rna-XM_017362136.1	superfamily	412238	1	153	4.51359e-107	302.498	cl00227	PEBP superfamily	-	-
Q#3 - >rna-XM_017362136.1	specific	176644	27	153	8.77285e-38	126.334	cd00866	PEBP_euk	-	cl00227
Q#3 - >rna-XM_017362136.1	non-specific	176642	56	153	2.27657e-17	73.9696	cd00457	PEBP	N	cl00227
Q#3 - >rna-XM_017362136.1	specific	395925	64	126	5.14629e-11	56.9941	pfam01161	PBP	C	cl00227
Q#3 - >rna-XM_017362136.1	non-specific	224793	64	151	7.64201e-06	43.5214	COG1881	PEBP	N	cl00227
Q#3 - >rna-XM_017362136.1	non-specific	176643	64	134	1.58745e-05	42.2026	cd00865	PEBP_bact_arch	NC	cl00227
Q#3 - >rna-XM_017362136.1	non-specific	129572	64	134	0.00379014	35.5372	TIGR00481	TIGR00481	NC	cl00227
Q#4 - >rna-XM_017378851.1	non-specific	177765	1	173	1.88e-73	218.139	PLN00169	PLN00169	-	cl00227
Q#4 - >rna-XM_017378851.1	superfamily	412238	1	173	1.88e-73	218.139	cl00227	PEBP superfamily	-	-
Q#4 - >rna-XM_017378851.1	specific	176644	25	164	1.04677e-44	144.438	cd00866	PEBP_euk	-	cl00227
Q#4 - >rna-XM_017378851.1	non-specific	176642	40	164	3.90238e-20	81.6736	cd00457	PEBP	-	cl00227
Q#4 - >rna-XM_017378851.1	specific	395925	65	162	1.45219e-11	58.9201	pfam01161	PBP	-	cl00227
Q#4 - >rna-XM_017378851.1	non-specific	224793	55	141	2.05082e-06	45.4474	COG1881	PEBP	N	cl00227
Q#4 - >rna-XM_017378851.1	non-specific	176643	65	125	4.21656e-05	41.4322	cd00865	PEBP_bact_arch	NC	cl00227
Q#5 - >rna-XM_017385128.1	non-specific	177765	98	267	4.52797e-76	228.539	PLN00169	PLN00169	-	cl00227
Q#5 - >rna-XM_017385128.1	superfamily	412238	98	267	4.52797e-76	228.539	cl00227	PEBP superfamily	-	-
Q#5 - >rna-XM_017385128.1	specific	176644	118	258	2.0618e-42	142.127	cd00866	PEBP_euk	-	cl00227
Q#5 - >rna-XM_017385128.1	non-specific	176642	133	258	2.44238e-19	82.0588	cd00457	PEBP	-	cl00227
Q#5 - >rna-XM_017385128.1	specific	395925	158	220	3.2903e-11	59.6905	pfam01161	PBP	C	cl00227
Q#5 - >rna-XM_017385128.1	non-specific	176643	158	218	0.000215698	40.6618	cd00865	PEBP_bact_arch	NC	cl00227
Q#5 - >rna-XM_017385128.1	non-specific	224793	158	220	0.00106124	38.899	COG1881	PEBP	NC	cl00227
Q#6 - >rna-XM_017385066.1	non-specific	177765	1	174	3.01464e-87	253.192	PLN00169	PLN00169	-	cl00227
Q#6 - >rna-XM_017385066.1	superfamily	412238	1	174	3.01464e-87	253.192	cl00227	PEBP superfamily	-	-
Q#6 - >rna-XM_017385066.1	specific	176644	27	165	4.12605e-41	135.579	cd00866	PEBP_euk	-	cl00227
Q#6 - >rna-XM_017385066.1	non-specific	176642	40	165	2.8544e-19	79.7476	cd00457	PEBP	-	cl00227
Q#6 - >rna-XM_017385066.1	specific	395925	65	163	1.57763e-07	48.1345	pfam01161	PBP	-	cl00227
Q#6 - >rna-XM_017385066.1	non-specific	224793	65	125	0.0024353	36.973	COG1881	PEBP	NC	cl00227
Q#6 - >rna-XM_017385066.1	non-specific	176643	65	125	0.00617348	35.269	cd00865	PEBP_bact_arch	NC	cl00227
Q#7 - >rna-XM_017385406.1	non-specific	177765	4	178	1.05717e-75	224.302	PLN00169	PLN00169	-	cl00227
Q#7 - >rna-XM_017385406.1	superfamily	412238	4	178	1.05717e-75	224.302	cl00227	PEBP superfamily	-	-
Q#7 - >rna-XM_017385406.1	specific	176644	29	169	1.48911e-42	139.431	cd00866	PEBP_euk	-	cl00227
Q#7 - >rna-XM_017385406.1	non-specific	176642	39	169	8.84551e-19	78.592	cd00457	PEBP	-	cl00227
Q#7 - >rna-XM_017385406.1	specific	395925	69	167	8.05276e-13	62.3869	pfam01161	PBP	-	cl00227
Q#7 - >rna-XM_017385406.1	non-specific	176643	69	129	1.51913e-05	42.973	cd00865	PEBP_bact_arch	NC	cl00227
Q#7 - >rna-XM_017385406.1	non-specific	224793	69	131	4.74467e-05	41.5954	COG1881	PEBP	NC	cl00227
Q#8 - >rna-XM_017391180.1	specific	176644	4	135	2.24558e-39	130.186	cd00866	PEBP_euk	-	cl00227
Q#8 - >rna-XM_017391180.1	superfamily	412238	4	135	2.24558e-39	130.186	cl00227	PEBP superfamily	-	-
Q#8 - >rna-XM_017391180.1	non-specific	177765	1	141	4.50826e-33	114.52	PLN00169	PLN00169	-	cl00227
Q#8 - >rna-XM_017391180.1	specific	395925	25	135	2.06355e-10	55.0681	pfam01161	PBP	-	cl00227
Q#8 - >rna-XM_017391180.1	non-specific	176642	17	128	1.40343e-07	47.776	cd00457	PEBP	-	cl00227
Q#8 - >rna-XM_017391180.1	non-specific	224793	37	92	2.54459e-06	44.677	COG1881	PEBP	NC	cl00227
Q#8 - >rna-XM_017391180.1	non-specific	176643	37	94	0.000255463	38.7358	cd00865	PEBP_bact_arch	NC	cl00227
Q#8 - >rna-XM_017391180.1	non-specific	129572	24	94	0.00246249	35.9224	TIGR00481	TIGR00481	C	cl00227
Q#9 - >rna-XM_017403215.1	non-specific	177765	1	174	3.38828e-82	240.48	PLN00169	PLN00169	-	cl00227
Q#9 - >rna-XM_017403215.1	superfamily	412238	1	174	3.38828e-82	240.48	cl00227	PEBP superfamily	-	-
Q#9 - >rna-XM_017403215.1	non-specific	177765	1	174	3.38828e-82	240.48	PLN00169	PLN00169	-	cl00227
Q#9 - >rna-XM_017403215.1	specific	176644	25	165	8.71348e-44	142.127	cd00866	PEBP_euk	-	cl00227
Q#9 - >rna-XM_017403215.1	non-specific	176644	25	165	8.71348e-44	142.127	cd00866	PEBP_euk	-	cl00227
Q#9 - >rna-XM_017403215.1	non-specific	176642	19	165	4.55676e-17	73.9696	cd00457	PEBP	-	cl00227
Q#9 - >rna-XM_017403215.1	non-specific	176642	19	165	4.55676e-17	73.9696	cd00457	PEBP	-	cl00227
Q#9 - >rna-XM_017403215.1	specific	395925	65	163	1.63909e-13	63.9277	pfam01161	PBP	-	cl00227
Q#9 - >rna-XM_017403215.1	non-specific	395925	65	163	1.63909e-13	63.9277	pfam01161	PBP	-	cl00227
Q#9 - >rna-XM_017403215.1	non-specific	224793	1	127	1.25766e-07	48.9142	COG1881	PEBP	C	cl00227
Q#9 - >rna-XM_017403215.1	non-specific	224793	1	127	1.25766e-07	48.9142	COG1881	PEBP	C	cl00227
Q#9 - >rna-XM_017403215.1	non-specific	176643	65	125	1.67329e-07	47.9806	cd00865	PEBP_bact_arch	NC	cl00227
Q#9 - >rna-XM_017403215.1	non-specific	176643	65	125	1.67329e-07	47.9806	cd00865	PEBP_bact_arch	NC	cl00227
Q#10 - >rna-XM_017403214.1	non-specific	177765	1	174	3.38828e-82	240.48	PLN00169	PLN00169	-	cl00227
Q#10 - >rna-XM_017403214.1	superfamily	412238	1	174	3.38828e-82	240.48	cl00227	PEBP superfamily	-	-
Q#10 - >rna-XM_017403214.1	non-specific	177765	1	174	3.38828e-82	240.48	PLN00169	PLN00169	-	cl00227
Q#10 - >rna-XM_017403214.1	specific	176644	25	165	8.71348e-44	142.127	cd00866	PEBP_euk	-	cl00227
Q#10 - >rna-XM_017403214.1	non-specific	176644	25	165	8.71348e-44	142.127	cd00866	PEBP_euk	-	cl00227
Q#10 - >rna-XM_017403214.1	non-specific	176642	19	165	4.55676e-17	73.9696	cd00457	PEBP	-	cl00227
Q#10 - >rna-XM_017403214.1	non-specific	176642	19	165	4.55676e-17	73.9696	cd00457	PEBP	-	cl00227
Q#10 - >rna-XM_017403214.1	specific	395925	65	163	1.63909e-13	63.9277	pfam01161	PBP	-	cl00227
Q#10 - >rna-XM_017403214.1	non-specific	395925	65	163	1.63909e-13	63.9277	pfam01161	PBP	-	cl00227
Q#10 - >rna-XM_017403214.1	non-specific	224793	1	127	1.25766e-07	48.9142	COG1881	PEBP	C	cl00227
Q#10 - >rna-XM_017403214.1	non-specific	224793	1	127	1.25766e-07	48.9142	COG1881	PEBP	C	cl00227
Q#10 - >rna-XM_017403214.1	non-specific	176643	65	125	1.67329e-07	47.9806	cd00865	PEBP_bact_arch	NC	cl00227
Q#10 - >rna-XM_017403214.1	non-specific	176643	65	125	1.67329e-07	47.9806	cd00865	PEBP_bact_arch	NC	cl00227
Q#11 - >rna-XM_017361470.1	specific	177765	1	175	6.18439e-134	371.063	PLN00169	PLN00169	-	cl00227
Q#11 - >rna-XM_017361470.1	superfamily	412238	1	175	6.18439e-134	371.063	cl00227	PEBP superfamily	-	-
Q#11 - >rna-XM_017361470.1	specific	176644	28	164	3.917e-43	140.586	cd00866	PEBP_euk	-	cl00227
Q#11 - >rna-XM_017361470.1	non-specific	176642	38	164	4.41848e-18	76.666	cd00457	PEBP	-	cl00227
Q#11 - >rna-XM_017361470.1	specific	395925	65	127	1.12073e-11	59.3053	pfam01161	PBP	C	cl00227
Q#11 - >rna-XM_017361470.1	non-specific	176643	65	135	1.46808e-06	45.6694	cd00865	PEBP_bact_arch	NC	cl00227
Q#11 - >rna-XM_017361470.1	non-specific	224793	65	99	3.54898e-06	44.677	COG1881	PEBP	NC	cl00227
Q#11 - >rna-XM_017361470.1	non-specific	129572	65	135	0.000963283	37.4632	TIGR00481	TIGR00481	NC	cl00227
Q#12 - >rna-XM_017366611.1	specific	176643	9	168	5.30597e-48	152.755	cd00865	PEBP_bact_arch	-	cl00227
Q#12 - >rna-XM_017366611.1	superfamily	412238	9	168	5.30597e-48	152.755	cl00227	PEBP superfamily	-	-
Q#12 - >rna-XM_017366611.1	specific	395925	20	168	1.75153e-41	135.575	pfam01161	PBP	-	cl00227
Q#12 - >rna-XM_017366611.1	specific	224793	8	168	6.4983e-40	132.888	COG1881	PEBP	-	cl00227
Q#12 - >rna-XM_017366611.1	non-specific	129572	35	168	3.0398e-30	107.184	TIGR00481	TIGR00481	-	cl00227
Q#12 - >rna-XM_017366611.1	non-specific	182339	8	168	6.5722e-23	88.6792	PRK10257	PRK10257	-	cl00227
Q#12 - >rna-XM_017366611.1	non-specific	176642	10	160	2.5894e-20	82.0588	cd00457	PEBP	-	cl00227
Q#12 - >rna-XM_017366611.1	non-specific	182092	5	168	3.56055e-16	71.9018	PRK09818	PRK09818	-	cl00227
Q#12 - >rna-XM_017366611.1	non-specific	176644	37	133	0.00372676	35.812	cd00866	PEBP_euk	C	cl00227
